# Supplementary material
Source: PubMed Central journal article supplement (PMC10314073)
Supplement: jclinpath-2021-207556supp001.pdf [file jclinpath-2021-207556supp001.pdf]

**Supplemental table 1:** Detection of SARS-CoV-2 T-cell and antibody responses to S-proteins and N-proteins in high- and low-risk negative groups.

| <b>SARS-CoV-2 assay</b>         | <b>High-risk negative group (n=38)</b> | <b>Low-risk negative group (n=72)</b> | <b>p-value</b> |
|---------------------------------|----------------------------------------|---------------------------------------|----------------|
| SARS-CoV-2 N-protein T-cells    | 24 (63%)                               | 37 (51%)                              | p=0.003        |
| SARS-CoV-2 S-protein T-cells    | 24 (63%)                               | 29 (40%)                              | p=0.001        |
| Any SARS-CoV-2 T-cells          | 27 (71%)                               | 41(57%)                               | p=0.018        |
| SARS-CoV-2 N-protein antibodies | 6 (16%)                                | 2 (3%)                                | p<0.001        |
| SARS-CoV-2 S-protein antibodies | 6 (16%)                                | 2 (3%)                                | p<0.001        |
