# Supplementary material
Source: PubMed Central journal article supplement (PMC10314073)
Supplement: jclinpath-2021-207556supp002.pdf [file jclinpath-2021-207556supp002.pdf]

**Supplemental Table 2** Magnitude of T-cell responses to SARS-CoV-2 S-protein and N-protein expressed as a Stimulation Index (SI) in the SARS-CoV-2 high and low-risk negative group.

|                            | N-protein SI            |                          | S-protein SI            |                          |
|----------------------------|-------------------------|--------------------------|-------------------------|--------------------------|
|                            | Negative low-risk group | Negative high-risk group | Negative low-risk group | Negative high-risk group |
| <b>Median</b>              | 3                       | 5                        | 2.1                     | 3.25                     |
| <b>Interquartile range</b> | 1.6-5                   | 2.13-10                  | 1.2-5.4                 | 2-5.93                   |
| <b>Range</b>               | 0-56.5                  | 0.3-202                  | 0-31                    | 0.5-96                   |
